# Supplementary material for: Cu-Doped Sb2Se3 Thin-Film Solar Cells Based on Hybrid Pulsed Electron Deposition/Radio Frequency Magnetron Sputtering Growth Techniques
Source: MDPI journal article supplement (doi:10.3390/solar4010004), 2024-02-04
Supplement: s1 [file s1]

# **Cu-doped $\text{Sb}_2\text{Se}_3$ thin film solar cells based on hybrid Pulsed Electron Deposition/Radio Frequency Magnetron Sputtering growth techniques**

Roberto Jakomin, Stefano Rampino, Giulia Spaggiari, Michele Casappa, Giovanna Trevisi, Elena Del Canale, Enos Gombia, Matteo Bronzoni, Kodjo Kekeli Sossoe, Francesco Mezzadri and Francesco Pattini

## **Supplementary Materials**

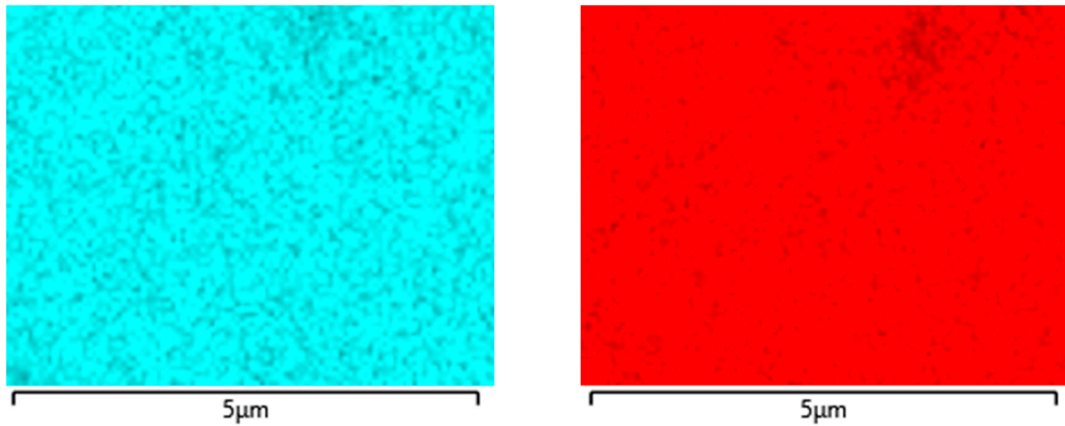

Figure S1: EDX mapping of composition for the stoichiometric (40/60 at. ratio)  $\text{Sb}_2\text{Se}_3$  films acquired by scanning electron microscope (FE-SEM/FIB, Zeiss Auriga Compact) equipped with an energy dispersive x-ray spectrometer (EDX, Oxford).

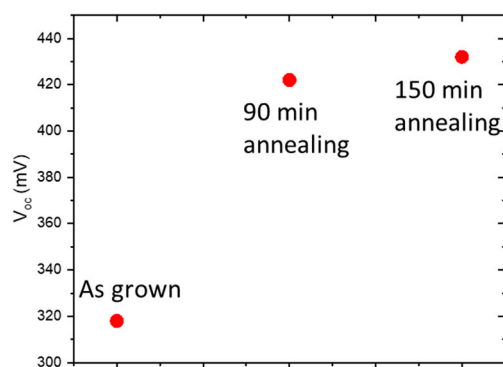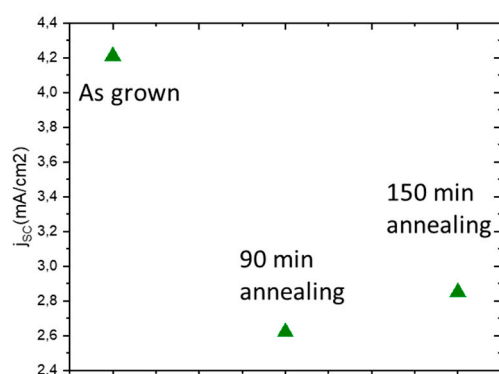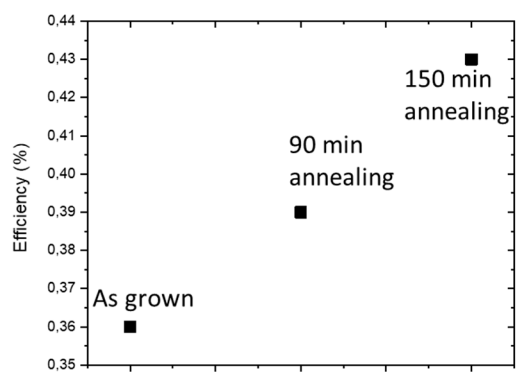

Figure S2: From top:  $V_{oc}$ ,  $J_{sc}$  and efficiency variation after annealing treatments compared with as-grown PED-grown 5%Cu:Sb<sub>2</sub>Se<sub>3</sub> solar cells with AZO/UZO/CdS/Cu:Sb<sub>2</sub>Se<sub>3</sub>/FTO/Glass structure.
